# Supplementary material for: Cavitated Charcoal—An Innovative Method for Affecting the Biochemical Properties of Soil
Source: MDPI journal article supplement (doi:10.3390/ma14092466), 2021-05-10
Supplement: s1 [file s1]

## Article

# Cavitated Charcoal—An Innovative Method for Affecting the Biochemical Properties of Soil

Krzysztof Gondek <sup>1,\*</sup>, Monika Mierzwa-Hersztek <sup>1,2</sup>, Wojciech Grzymała <sup>3</sup>, Tomasz Głąb <sup>4,\*</sup> and Tomasz Bajda <sup>2,\*</sup>

<sup>1</sup> Department of Agricultural and Environmental Chemistry, Faculty of Agriculture and Economics, University of Agriculture in Krakow, al. Mickiewicza 21, 31-120 Krakow, Poland

<sup>2</sup> Faculty of Geology, Geophysics and Environmental Protection, AGH University of Science and Technology, al. Mickiewicza 30, 30-059 Krakow, Poland

<sup>3</sup> BIRKO PROJEKT, ul. Żabia 4/23, 05-220 Zielonka, Poland; birkoprojekt@gmail.com

<sup>4</sup> Department of Machinery Exploitation, Ergonomics and Production Processes, Faculty of Production and Power Engineering, University of Agriculture in Krakow, ul. Balicka 116B, 31-149 Krakow, Poland

\* Correspondence: rrgondek@cyf-kr.edu.pl (K.G.); rtglab@cyf-kr.edu.pl (T.G.); bajda@agh.edu.pl (T.B.)

**Citation:** Gondek, K.; Mierzwa-Hersztek, M.; Grzymała, W.; Głąb, T.; Bajda, T. Cavitated Charcoal—An Innovative Method for Affecting the Biochemical Properties of Soil. *2021*, *14*, 2466. <https://doi.org/10.3390/xma14092466>

Academic Editor: Tamas Varga

Received: 13 April 2021

Accepted: 4 May 2021

Published: date

**Publisher's Note:** MDPI stays neutral with regard to jurisdictional claims in published maps and institutional affiliations.

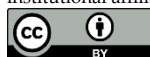

**Copyright:** © 2021 by the authors. Licensee MDPI, Basel, Switzerland. This article is an open access article distributed under the terms and conditions of the Creative Commons Attribution (CC BY) license (<http://creativecommons.org/licenses/by/4.0/>).

**Table S1.** Analysis of variance (two-way ANOVA).

| Parameter                                                               | Soil      |          | Rate     |          | S × R    |          |
|-------------------------------------------------------------------------|-----------|----------|----------|----------|----------|----------|
|                                                                         | <i>F</i>  | <i>p</i> | <i>F</i> | <i>p</i> | <i>F</i> | <i>p</i> |
| DM                                                                      | 48.38     | <0.001   | 265.77   | <0.001   | 138.10   | <0.001   |
| RDM                                                                     | 50.77     | <0.001   | 7.28     | 0.001    | 3.88     | 0.017    |
| pH H <sub>2</sub> O                                                     | 11,970.30 | <0.001   | 489.35   | <0.001   | 60.52    | <0.001   |
| pH KCl                                                                  | 2703.11   | <0.001   | 167.46   | <0.001   | 107.09   | <0.001   |
| EC                                                                      | 990.83    | <0.001   | 77.35    | <0.001   | 37.59    | <0.001   |
| N <sub>tot</sub>                                                        | 14,104.05 | <0.001   | 8.01     | 0.001    | 7.13     | 0.001    |
| C <sub>tot</sub>                                                        | 1908.44   | <0.001   | 36.35    | <0.001   | 6.00     | 0.002    |
| BR                                                                      | 293.84    | <0.001   | 77.98    | <0.001   | 17.62    | <0.001   |
| SIR                                                                     | 195.56    | <0.001   | 21.41    | <0.001   | 5.84     | 0.003    |
| DhA                                                                     | 4.65      | 0.043    | 10.59    | <0.001   | 3.97     | 0.016    |
| Ure                                                                     | 576.82    | <0.001   | 131.32   | <0.001   | 18.92    | <0.001   |
| QR ratio                                                                | 18.57     | <0.001   | 10.53    | <0.001   | 4.68     | 0.008    |
| Total content of heavy metals in soil                                   |           |          |          |          |          |          |
| Cd <sub>Tot</sub>                                                       | 3425.54   | <0.001   | 10.24    | <0.001   | 13.21    | <0.001   |
| Cr <sub>Tot</sub>                                                       | 11,267.16 | <0.001   | 7.65     | 0.001    | 3.47     | 0.026    |
| Cu <sub>Tot</sub>                                                       | 2036.76   | <0.001   | 0.33     | 0.851    | 0.82     | 0.526    |
| Fe <sub>Tot</sub>                                                       | 61,084.73 | <0.001   | 16.76    | <0.001   | 2.30     | 0.095    |
| Mn <sub>Tot</sub>                                                       | 8347.27   | <0.001   | 2.80     | 0.054    | 1.83     | 0.162    |
| Ni <sub>Tot</sub>                                                       | 4848.49   | <0.001   | 2.34     | 0.090    | 6.23     | 0.002    |
| Pb <sub>Tot</sub>                                                       | 854.06    | <0.001   | 2.64     | 0.064    | 0.96     | 0.452    |
| Zn <sub>Tot</sub>                                                       | 21,996.03 | <0.001   | 2.66     | 0.063    | 1.20     | 0.340    |
| Heavy metals extracted with 0.01 mol·dm <sup>-3</sup> CaCl <sub>2</sub> |           |          |          |          |          |          |
| Cd                                                                      | 26,960.08 | <0.001   | 167.39   | <0.001   | 41.70    | <0.001   |
| Cr                                                                      | 451.25    | <0.001   | 7.38     | 0.001    | 4.16     | 0.013    |
| Cu                                                                      | 898.36    | <0.001   | 128.25   | <0.001   | 53.86    | <0.001   |
| Fe                                                                      | 30.68     | <0.001   | 6.44     | 0.002    | 3.34     | 0.030    |
| Mn                                                                      | 37,899.64 | <0.001   | 389.22   | <0.001   | 209.45   | <0.001   |
| Ni                                                                      | 35,113.78 | <0.001   | 225.73   | <0.001   | 180.98   | <0.001   |
| Pb                                                                      | 84.49     | <0.001   | 4.67     | 0.008    | 2.34     | 0.091    |
| Zn                                                                      | 12,731.63 | <0.001   | 180.35   | <0.001   | 47.35    | <0.001   |
| Heavy metals in above-ground biomass                                    |           |          |          |          |          |          |
| Cd                                                                      | 3654.01   | <0.001   | 15.12    | <0.001   | 59.74    | <0.001   |
| Cr                                                                      | 6.72      | 0.017    | 5.88     | 0.003    | 3.62     | 0.023    |
| Cu                                                                      | 27.67     | <0.001   | 1.61     | 0.210    | 2.13     | 0.115    |
| Fe                                                                      | 0.25      | 0.626    | 11.99    | <0.001   | 2.78     | 0.055    |
| Mn                                                                      | 3.66      | 0.070    | 11.54    | <0.001   | 10.79    | <0.001   |
| Ni                                                                      | 134.49    | <0.001   | 8.62     | <0.001   | 8.29     | <0.001   |
| Pb                                                                      | 14.20     | 0.001    | 27.42    | <0.001   | 8.23     | <0.001   |
| Zn                                                                      | 185.21    | <0.001   | 2.19     | 0.107    | 2.89     | 0.049    |
| Heavy metals in roots                                                   |           |          |          |          |          |          |
| Cd                                                                      | 26.46     | <0.001   | 3.75     | 0.020    | 9.88     | <0.001   |
| Cr                                                                      | 39.48     | <0.001   | 5.60     | 0.003    | 1.62     | 0.209    |
| Cu                                                                      | 20.90     | <0.001   | 2.23     | 0.103    | 4.01     | 0.015    |
| Fe                                                                      | 4.24      | 0.053    | 4.74     | 0.007    | 1.70     | 0.190    |
| Mn                                                                      | 33.24     | <0.001   | 6.72     | 0.001    | 4.08     | 0.014    |
| Ni                                                                      | 17.15     | 0.001    | 3.22     | 0.034    | 1.76     | 0.177    |
| Pb                                                                      | 1.02      | 0.324    | 2.41     | 0.083    | 3.04     | 0.041    |
| Zn                                                                      | 61.77     | <0.001   | 9.51     | <0.001   | 8.67     | <0.001   |

**Table S2.** Pearson's correlation coefficients (*r*) for relationships between the CHAR-C rate and soil and plant characteristics.

| Parameter                                                               | CHAR-C Rate |   |
|-------------------------------------------------------------------------|-------------|---|
| DM                                                                      | 0.748       | * |
| RDM                                                                     | 0.279       |   |
| pH H <sub>2</sub> O                                                     | 0.371       | * |
| pH KCl                                                                  | 0.415       | * |
| EC                                                                      | 0.426       | * |
| N <sub>tot</sub>                                                        | −0.027      |   |
| C <sub>tot</sub>                                                        | 0.258       |   |
| BR                                                                      | 0.419       | * |
| SIR                                                                     | 0.478       | * |
| DhA                                                                     | −0.558      | * |
| Ure                                                                     | −0.070      |   |
| QR ratio                                                                | −0.011      |   |
| Total content of heavy metals in soil                                   |             |   |
| Cd                                                                      | −0.001      |   |
| Cr                                                                      | −0.034      |   |
| Cu                                                                      | 0.017       |   |
| Fe                                                                      | −0.031      |   |
| Mn                                                                      | 0.015       |   |
| Ni                                                                      | −0.007      |   |
| Pb                                                                      | −0.072      |   |
| Zn                                                                      | 0.017       |   |
| Heavy metals extracted with 0.01 mol·dm <sup>−3</sup> CaCl <sub>2</sub> |             |   |
| Cd                                                                      | −0.155      |   |
| Cr                                                                      | −0.175      |   |
| Cu                                                                      | −0.397      | * |
| Fe                                                                      | −0.048      |   |
| Mn                                                                      | −0.190      |   |
| Ni                                                                      | −0.156      |   |
| Pb                                                                      | −0.333      |   |
| Zn                                                                      | −0.229      |   |
| Heavy metals in above-ground biomass                                    |             |   |
| Cd                                                                      | 0.108       |   |
| Cr                                                                      | −0.118      |   |
| Cu                                                                      | −0.085      |   |
| Fe                                                                      | −0.253      |   |
| Mn                                                                      | −0.431      | * |
| Ni                                                                      | −0.342      |   |
| Pb                                                                      | −0.648      | * |
| Zn                                                                      | −0.149      |   |
| Heavy metals in roots                                                   |             |   |
| Cd                                                                      | 0.363       | * |
| Cr                                                                      | −0.116      |   |
| Cu                                                                      | −0.033      |   |
| Fe                                                                      | 0.215       |   |
| Mn                                                                      | −0.421      | * |
| Ni                                                                      | −0.099      |   |
| Pb                                                                      | −0.345      |   |
| Zn                                                                      | −0.388      | * |
